# Supplementary material
Source: publisher site journal article supplement (http://kjim.org/upload/media/kjim-2023-206-Supplementary-6.pdf)
Supplement: Supplementary file 1 [file kjim-2023-206-Supplementary-6.pdf]

## 6. Searching terms and strategies

### 1) Urate lowering therapy – KQ2,3,4,5,6,7,8

MEDLINE

1. (("Gout"[Mesh]) OR "Hyperuricemia"[Mesh]) OR "Uric Acid"[Mesh] 31949
2. Gout[TIAB] OR Gouts[TIAB] OR Gouty[TIAB] OR Hyperuricemia[TIAB] OR Urate[TIAB] OR "Uric Acid"[TIAB] OR hyperuricacidaemia[TIAB] OR hyperuricacidemia[TIAB] OR hyperuricaemia[TIAB] 43212
3. 1 OR 2 50601
4. (((("Allopurinol"[Mesh]) OR "Xanthine Oxidase"[Mesh]) OR "Febuxostat"[Mesh]) OR "Benzbromarone"[Mesh]) OR "Uricosuric Agents" [Pharmacological Action]) 20133
5. Probenecid[MeSH Term] OR Apazone[MeSH Term] OR Benzbromarone[MeSH Term] OR benziodarone[Supplementary Concept] OR Halofenate[MeSH Term] OR indacrinone[Supplementary Concept] OR lesinurad[Supplementary Concept] OR Probenecid[MeSH Term] OR Sulfinpyrazone[MeSH Term] OR Ticrynafen[MeSH Term] OR traxanox[Supplementary Concept] OR Zoxazolamine[MeSH Term] 5739
6. allopurinol[TIAB] OR "Xanthine Oxidase"[TIAB] OR Uribez[TIAB] OR Allopurin[TIAB] OR Allorin[TIAB] OR Allpargin[TIAB] OR Allural[TIAB] OR "Pan Quimica"[TIAB] OR Apulonga[TIAB] OR Apurin[TIAB] OR Atisuril[TIAB] OR Bleminol[TIAB] OR Caplenal[TIAB] OR Capurate[TIAB] OR Cellidrin[TIAB] OR Embarin[TIAB] OR Suspendol[TIAB] OR Foligan[TIAB] OR Hamarin[TIAB] OR Lopurin[TIAB] OR Lysuron[TIAB] OR Jenapurinol[TIAB] OR Milurit[TIAB] OR Milurite[TIAB] OR Novopurol[TIAB] OR Uripurinol[TIAB] OR Urosin[TIAB] OR Urtias[TIAB] OR Xanthomax[TIAB] OR Uridocid[TIAB] OR Xanturic[TIAB] OR Zygout[TIAB] OR Zyloprim[TIAB] OR Zyloric[TIAB] OR Pureduct[TIAB] OR Purinol[TIAB] OR Progout[TIAB] OR Remid[TIAB] OR Rimapurinol[TIAB] OR Antigout[TIAB] OR Antihyperuricemics[TIAB] OR Roucol[TIAB] OR Tipuric[TIAB] OR Allohexal[TIAB] OR Allohexan[TIAB] OR Alloprin[TIAB] OR Uloric[TIAB] OR febuxostat[TIAB] OR benzbromarone[TIAB] 15772
7. 4-6/OR 26482
8. 7 AND 3 6073

9. 8 NOT "review"[Publication Type] OR "review literature as topic"[MeSH Terms] 5268

10. 9 NOT "animals"[MeSH Terms] NOT ("humans"[MeSH Terms] AND "animals"[MeSH Terms]) 4286

#### Embase

1. 'gout'/exp OR 'hyperuricemia'/exp OR 'urate'/exp OR 'uric acid'/exp 68654

2. hyperuricacidaemia:ab,ti OR hyperuricacidemia:ab,ti OR hyperuricaemia:ab,ti OR Gout:ab,ti OR Gouts:ab,ti OR Gouty:ab,ti OR Hyperuricemia:ab,ti OR Urate:ab,ti OR 'Uric Acid':ab,ti 59267

3. 1 or 2 80850

4. 'uricosuric agent'/exp OR 'xanthine oxidase'/exp OR 'allopurinol'/exp OR 'febuxostat'/exp 47326

5. allopurinol:ab,ti OR 'xanthine oxidase':ab,ti OR uribenz:ab,ti OR allopurin:ab,ti OR allorin:ab,ti OR allpargin:ab,ti OR allural:ab,ti OR 'pan quimica':ab,ti OR apulonga:ab,ti OR apurin:ab,ti OR atisuril:ab,ti OR bleminol:ab,ti OR caplenal:ab,ti OR capurate:ab,ti OR cellidrin:ab,ti OR embarin:ab,ti OR suspendol:ab,ti OR foligan:ab,ti OR hamarin:ab,ti OR lopurin:ab,ti OR lysuron:ab,ti OR jenapurinol:ab,ti OR milurit:ab,ti OR milurite:ab,ti OR novopurol:ab,ti OR uripurinol:ab,ti OR urosin:ab,ti OR urtias:ab,ti OR xanthomax:ab,ti OR uridocid:ab,ti OR xanturic:ab,ti OR zygot:ab,ti OR zyloprim:ab,ti OR zyloric:ab,ti OR pureduct:ab,ti OR purinol:ab,ti OR progout:ab,ti OR remid:ab,ti OR rimapurinol:ab,ti OR antigout:ab,ti OR antihyperuricemics:ab,ti OR roucol:ab,ti OR tipuric:ab,ti OR allohexal:ab,ti OR allohexan:ab,ti OR alloprin:ab,ti OR uloric:ab,ti OR febuxostat:ab,ti OR benzbromarone:ab,ti 20407

6. 4 OR 5 50988

7. 3 AND 6 12039

8. 7 NOT ('conference review'/it OR 'review'/it) 10414

9. 8 NOT ('animal cell'/de OR 'animal experiment'/de OR 'animal model'/de OR 'animal tissue'/de OR 'human cell'/de OR 'human tissue'/de OR 'in vitro study'/de OR 'nonhuman'/de) 7763

## KMbase

1. (((((((((((([ALL=Gout] OR [ALL=Gouty]) OR [ALL=Gouts]) OR [ALL=통풍]) OR [ALL=고요산혈증]) OR [ALL=Hyperuricemia]) OR [ALL=Uric Acid]) OR [ALL=요산]) OR [ALL=Urate]) OR [ALL=hyperuricacidaemiay]) OR [ALL=hyperuricacidemia]) OR [ALL=hyperuricaemia]) OR [ALL=고요산 혈증]) 1359
2. (((([ALL=allopurinol] OR [ALL=febuxostat]) OR [ALL=Xanthine Oxidase]) OR [ALL=알로푸리놀]) OR [ALL=페부소스타즈])
3. 1 AND 2 139

## COCHRANE

1. (Gout OR Gouts OR Gouty OR Hyperuricemia OR Urate OR “Uric Acid” OR hyperuricacidaemia OR hyperuricacidemia OR hyperuricaemia):ab,ti,kw 5148
2. MeSH descriptor:[gout] explode all trees 305
3. MeSH descriptor:[Uric Acid] explode all trees 1070
4. MeSH descriptor:[Hyperuricemia] explode all trees 206
5. 1-4/OR 5148
6. allopurinol OR “Xanthine Oxidase” OR Uri benz OR Allopurin OR Allorin OR Allpargin OR Allural OR “Pan Quimica” OR Apulonga OR Apurin OR Atisuril OR Bleminol OR Caplenal OR Capurate OR Cellidrin OR Embarin OR Suspendol OR Foligan OR Hamarin OR Lopurin OR Lysuron OR Jenapurinol OR Milurit OR Milurite OR Novopurol OR Uripurinol OR Urosin OR Urtias OR Xanthomax OR Uridocid OR Xanturic OR Zygout OR Zylprim OR Zyloric OR Pureduct OR Purinol OR Progout OR Remid OR Rimapurinol OR Antigout OR Antihyperuricemics OR Roucol OR Tipuric OR Allohexal OR Allohexan OR Allopurin OR Uloric OR febuxostat OR benzbromarone 1564
7. MeSH descriptor:[allopurinol] explode all trees 524

8. MeSH descriptor:[Xanthine Oxidase] explode all trees 134
9. MeSH descriptor:[febuxostat] explode all trees 106
10. MeSH descriptor:[benzbromarone] explode all trees 44
11. 6-10/OR 1564
12. 5 AND 11 891
13. 12/TRIAL 878

## **2) anti-inflammatory drugs – KQ1,2,3**

### MEDLINE

1. "Gout"[Mesh] 11876
2. Gout[TIAB] OR Gouts[TIAB] OR Gouty[TIAB] 13578
3. 1 OR 2 16416
4. aceclofenac[Supplementary Concept] OR acemetacin[Supplementary Concept] OR “acetaminophen, aspirin, caffeine drug combination”[Supplementary Concept] OR “acetaminophen, butalbital, caffeine drug combination”[Supplementary Concept] OR “acetaminophen, hydrocodone drug combination”[Supplementary Concept] OR acetosyringone[Supplementary Concept] OR acetovanillone[Supplementary Concept] OR “acetylsalicylic acid lysinate”[Supplementary Concept] OR Adapalene[Mesh] OR “Adapalene, Benzoyl Peroxide Drug Combination”[Mesh] OR alclofenac[Supplementary Concept] OR alminoprofen[Supplementary Concept] OR amiprilose[Supplementary Concept] OR Ampyrone[Mesh] OR “amylase, phosphates, proteases drug combinations”[Supplementary Concept] OR andrographolide[Supplementary Concept] OR anisodamine[Supplementary Concept] OR anisodine[Supplementary Concept] OR “antiflammin P2”[Supplementary Concept] OR Antipyrine[Mesh] OR Apazone[Mesh] OR apremilast[Supplementary Concept] OR Arteparon[Supplementary Concept] OR Arthrotec[Supplementary Concept] OR Aspirin[Mesh] OR “aspirin,

aluminum hydroxide, magnesium hydroxide drug combination”[Supplementary Concept] OR “aspirin, butalbital and caffeine drug combination”[Supplementary Concept] OR “aspirin, meprobamate drug combination”[Supplementary Concept] OR atrinositol[Supplementary Concept] OR azulene[Supplementary Concept] OR baicalin[Supplementary Concept] OR balsalazide[Supplementary Concept] OR bendazac[Supplementary Concept] OR “bendazac lysine”[Supplementary Concept] OR benorilate[Supplementary Concept] OR benoxaprofen[Supplementary Concept] OR benzobarbital[Supplementary Concept] OR berbamine[Supplementary Concept] OR “betulinic acid”[Supplementary Concept] OR bevonium[Supplementary Concept] OR “biphenylacetic acid”[Supplementary Concept] OR boldine[Supplementary Concept] OR “boswellic acid”[Supplementary Concept] OR bromfenac[Supplementary Concept] OR bucillamine[Supplementary Concept] OR Bufexamac[Mesh] OR bumadizone[Supplementary Concept] OR butibufen[Supplementary Concept] OR “carbaspirin calcium”[Supplementary Concept] OR carprofen[Supplementary Concept] OR caryophyllene[Supplementary Concept] OR castanospermine[Supplementary Concept] OR Celecoxib[Mesh] OR cepharanthine[Supplementary Concept] OR “chloroquine diphosphate”[Supplementary Concept] OR “choline magnesium trisalicylate”[Supplementary Concept] OR chrysarobin[Supplementary Concept] OR Clonixin[Mesh] OR Curcumin[Mesh] OR dauricine[Supplementary Concept] OR “dexketoprofen trometamol”[Supplementary Concept] OR Diclofenac[Mesh] OR “diclofenac hydroxyethylpyrrolidine”[Supplementary Concept] OR difenpiramide[Supplementary Concept] OR Diflunisal[Mesh] OR dimephosphon[Supplementary Concept] OR Dipyrone[Mesh] OR diucifon[Supplementary Concept] OR droxicam[Supplementary Concept] OR ebselen[Supplementary Concept] OR ecallantide[Supplementary Concept] OR eltenac[Supplementary Concept] OR “enfenamic acid”[Supplementary Concept] OR Epirizole[Mesh] OR Etanercept[Mesh] OR ethenzamide[Supplementary Concept] OR Ethonium[Supplementary Concept] OR Etodolac[Mesh] OR etofenamate[Supplementary Concept] OR Etoricoxib[Mesh] OR “evening primrose oil”[Supplementary Concept] OR “fenamic acid”[Supplementary Concept] OR fenbufen[Supplementary Concept] OR fenclofenac[Supplementary Concept] OR fenflumizole[Supplementary Concept] OR Fenoprofen[Mesh] OR fentiazac[Supplementary Concept] OR fepradinol[Supplementary Concept] OR Feprazone[Mesh] OR “ferulic acid”[Supplementary Concept] OR floctafenine[Supplementary Concept] OR flosulide[Supplementary Concept] OR flunixin[Supplementary Concept] OR “flunixin meglumine”[Supplementary Concept] OR flunoxaprofen[Supplementary Concept] OR fluproquazone[Supplementary Concept] OR Flurbiprofen[Mesh] OR “flurbiprofen axetil”[Supplementary Concept] OR glucametacin[Supplementary Concept] OR guacetisal[Supplementary Concept] OR helenalin[Supplementary Concept] OR

heliodermin[Supplementary Concept] OR hemodes[Supplementary Concept] OR higenamine[Supplementary Concept] OR Ibuprofen[Mesh] OR ibuproxam[Supplementary Concept] OR icatibant[Supplementary Concept] OR indobufen[Supplementary Concept] OR Indomethacin[Mesh] OR Indoprofen[Mesh] OR iodoantipyrine[Supplementary Concept] OR isoxicam[Supplementary Concept] OR kebuzone[Supplementary Concept] OR Ketoprofen[Mesh] OR “ketoprofen lysine”[Supplementary Concept] OR Ketorolac[Mesh] OR “Ketorolac Tromethamine”[Mesh] OR licofelone[Supplementary Concept] OR lisofylline[Supplementary Concept] OR obenzarit[Supplementary Concept] OR Ionazolac[Supplementary Concept] OR lornoxicam[Supplementary Concept] OR loxoprofen[Supplementary Concept] OR lumiracoxib[Supplementary Concept] OR “Magnesium Salicylate”[Supplementary Concept] OR magnolol[Supplementary Concept] OR manoalide[Supplementary Concept] OR Masoprocol[Mesh] OR “Meclofenamic Acid”[Mesh] OR “Mefenamic Acid”[Mesh] OR Meloxicam[Mesh] OR Mesalamine[Mesh] OR mizoribine[Supplementary Concept] OR mofebutazone[Supplementary Concept] OR mofezolac[Supplementary Concept] OR leucine[Supplementary Concept] OR Nabumetone[Mesh] OR nafamostat[Supplementary Concept] OR Naproxen[Mesh] OR Nebacetin[Supplementary Concept] OR nepafenac[Supplementary Concept] OR nifenazone[Supplementary Concept] OR “Niflumic Acid”[Mesh] OR nimesulide[Supplementary Concept] OR nitroaspirin[Supplementary Concept] OR “Olopatadine Hydrochloride”[Mesh] OR olsalazine[Supplementary Concept] OR olvanil[Supplementary Concept] OR “oren gedoku to”[Supplementary Concept] OR orgotein[Supplementary Concept] OR Oxaprozin[Mesh] OR Oxyphenbutazone[Mesh] OR almidrol[Supplementary Concept] OR parecoxib[Supplementary Concept] OR parthenolide[Supplementary Concept] OR peoniflorin[Supplementary Concept] OR phenidone[Supplementary Concept] OR Phenylbutazone[Mesh] OR pimecrolimus[Supplementary Concept] OR pirfenidone[Supplementary Concept] OR Piroxicam[Mesh] OR “piroxicam-beta-cyclodextrin”[Supplementary Concept] OR pirprofen[Supplementary Concept] OR proglumetacin[Supplementary Concept] OR propacetamol[Supplementary Concept] OR propionylcarnitine[Supplementary Concept] OR propyphenazone[Supplementary Concept] OR proquazone[Supplementary Concept] OR pyranoprofen[Supplementary Concept] OR pyrazolone[Supplementary Concept] OR pyrogenal[Supplementary Concept] OR Resveratrol[Mesh] OR RNS60[Supplementary Concept] OR rofecoxib[Supplementary Concept] OR “rosmarinic acid”[Supplementary Concept] OR Rumalon[Supplementary Concept] OR “saiko-keishi-to”[Supplementary Concept] OR saikosaponin[Supplementary Concept] OR salicin[Supplementary Concept] OR salicylamide[Supplementary Concept] OR Salicylates[Mesh] OR “salicylsalicylic acid”[Supplementary Concept] OR semapimod[Supplementary Concept] OR seratrodast[Supplementary Concept] OR serratiopeptidase[Supplementary Concept] OR shikonin[Supplementary

Concept] OR sinapaldehyde[Supplementary Concept] OR “Sodium Salicylate”[Mesh] OR Sulfasalazine[Mesh] OR Sulindac[Mesh] OR “sulindac sulfide”[Supplementary Concept] OR “sulindac sulfone”[Supplementary Concept] OR Suprofen[Mesh] OR suxibuzone[Supplementary Concept] OR tanshinone[Supplementary Concept] OR taxifolin[Supplementary Concept] OR tenidap[Supplementary Concept] OR tenoxicam[Supplementary Concept] OR tepoxalin[Supplementary Concept] OR “tiaprofenic acid”[Supplementary Concept] OR tiaramide[Supplementary Concept] OR tinoridine[Supplementary Concept] OR “tolfenamic acid”[Supplementary Concept] OR Tolmetin[Mesh] OR “tramadol, dexketoprofen drug combination”[Supplementary Concept] OR tranilast[Supplementary Concept] OR tribenoside[Supplementary Concept] OR “ursolic acid”[Supplementary Concept] OR valdecoxib[Supplementary Concept] OR zileuton[Supplementary Concept] OR zomepirac[Supplementary Concept] OR deflazacort [Supplementary Concept] OR “alclometasone dipropionate”[Supplementary Concept] OR amcinonide[Supplementary Concept] OR Beclomethasone[Mesh] OR Betamethasone[Mesh] OR “betamethasone acetate”[Supplementary Concept] OR “betamethasone benzoate”[Supplementary Concept] OR “betamethasone dipropionate, betamethasone sodium phosphate drug combination”[Supplementary Concept] OR “betamethasone sodium phosphate”[Supplementary Concept] OR “Betamethasone Valerate”[Mesh] OR Budesonide[Mesh] OR ciclesonide[Supplementary Concept] OR Clobetasol[Mesh] OR “clobetasone butyrate”[Supplementary Concept] OR clocortolone[Supplementary Concept] OR “clocortolone pivalate”[Supplementary Concept] OR Desoximetasone[Mesh] OR Dexamethasone[Mesh] OR “Dexamethasone Isonicotinate”[Mesh] OR “dichlorisone acetate”[Supplementary Concept] OR diflorasone[Supplementary Concept] OR Diflucortolone[Mesh] OR difluprednate[Supplementary Concept] OR “drocinonide phosphate potassium”[Supplementary Concept] OR Flumethasone[Mesh] OR “flumethasone pivalate”[Supplementary Concept] OR “Fluocinolone Acetonide”[Mesh] OR Fluocinonide[Mesh] OR “fluocortin butyl ester”[Supplementary Concept] OR Fluocortolone[Mesh] OR Fluorometholone[Mesh] OR “fluperolone acetate”[Supplementary Concept] OR “fluprednidene acetate”[Supplementary Concept] OR Fluprednisolone[Mesh] OR Flurandrenolone[Mesh] OR “Fluticasone-Salmeterol Drug Combination”[Mesh] OR halometasone[Supplementary Concept] OR medrysone[Supplementary Concept] OR “Melengestrol Acetate”[Mesh] OR Methylprednisolone[Mesh] OR “Methylprednisolone Hemisuccinate”[Mesh] OR “Methylprednisolone Acetate”[Mesh] OR Paramethasone[Mesh] OR prednicarbate[Supplementary Concept] OR Prednisolone[Mesh] OR “prednisolone hemisuccinate”[Supplementary Concept] OR “prednisolone phosphate”[Supplementary Concept] OR Prednisone[Mesh] OR rimexolone[Supplementary Concept] OR terofenamate[Supplementary Concept] OR “Tobramycin, Dexamethasone Drug Combination”[Mesh] OR Triamcinolone[Mesh] OR

“Triamcinolone Acetonide”[Mesh] OR “triamcinolone benetonide”[Supplementary Concept] 371387

5. "Colchicine"[Mesh] OR "Anti-Inflammatory Agents, Non-Steroidal"[Pharmacological Action] OR "Glucocorticoids"[Mesh] OR "Glucocorticoids"[Pharmacological Action] 415968

6. colchicine[TIAB] OR Demecolcine[TIAB] OR Colchamine[TIAB] OR Colcemide[TIAB] OR Colcemid[TIAB] OR Lumicolchicines[TIAB] OR NSAID[TIAB] OR aceclofenac[TIAB] OR Falcol[TIAB] OR “Falcol Difucrem”[TIAB] OR “Clanza CR”[TIAB] OR Preservex[TIAB] OR Biofenac[TIAB] OR Sanein[TIAB] OR Beofenac[TIAB] OR Aital[TIAB] OR Bristaflam[TIAB] OR Gerbin[TIAB] OR Diclofenac[TIAB] OR diclofenac[TIAB] OR naproxen[TIAB] OR ibuprofen[TIAB] OR zaltoprofen[TIAB] OR indomethacin[TIAB] OR celecoxib[TIAB] OR nabumeton[TIAB] 89591

7. aceclofenac[TIAB] OR acemetacin[TIAB] OR “acetaminophen”[TIAB] OR acetosyringone[TIAB] OR acetovanillone[TIAB] OR “acetylsalicylic acid lysinate”[TIAB] OR Adapalene[TIAB] OR alclofenac[TIAB] OR alminoprofen[TIAB] OR amiprilose[TIAB] OR Ampyrone[TIAB] OR “amylase, phosphates, proteases drug combinations”[TIAB] OR andrographolide[TIAB] OR anisodamine[TIAB] OR anisodine[TIAB] OR “antiflammin P2”[TIAB] OR Antipyrine[TIAB] OR Apazone[TIAB] OR apremilast[TIAB] OR Arteparon[TIAB] OR Arthrotec[TIAB] OR Aspirin[TIAB] OR atrinositol[TIAB] OR azulene[TIAB] OR baicalin[TIAB] OR balsalazide[TIAB] OR bendazac[TIAB] OR benorilate[TIAB] OR benoxaprofen[TIAB] OR benzobarbital[TIAB] OR berbamine[TIAB] OR “betulinic acid”[TIAB] OR bevonium[TIAB] OR “biphenylacetic acid”[TIAB] OR boldine[TIAB] OR “boswellic acid”[TIAB] OR bromfenac[TIAB] OR bucillamine[TIAB] OR Bufexamac[TIAB] OR bumadizone[TIAB] OR butibufen[TIAB] OR “carbaspirin calcium”[TIAB] OR carprofen[TIAB] OR caryophyllene[TIAB] OR castanospermine[TIAB] OR Celecoxib[TIAB] OR cepharanthine[TIAB] OR “chloroquine diphosphate”[TIAB] OR “choline magnesium trisalicylate”[TIAB] OR chrysarobin[TIAB] OR Clonixin[TIAB] OR Curcumin[TIAB] OR dauricine[TIAB] OR “dexketoprofen trometamol”[TIAB] OR Diclofenac[TIAB] OR “diclofenac hydroxyethylpyrrolidine”[TIAB] OR difenpiramide[TIAB] OR Diflunisal[TIAB] OR dimephosphon[TIAB] OR Dipyrone[TIAB] OR diucifon[TIAB] OR droxicam[TIAB] OR ebselen[TIAB] OR ecallantide[TIAB] OR eltenac[TIAB] OR “enfenamic acid”[TIAB] OR Epirizole[TIAB] OR Etanercept[TIAB] OR ethenzamide[TIAB] OR Ethonium[TIAB] OR Etodolac[TIAB] OR etofenamate[TIAB] OR Etoricoxib[TIAB] OR “evening primrose oil”[TIAB] OR “fenamic acid”[TIAB] OR fenbufen[TIAB] OR fenclofenac[TIAB] OR fenflumizole[TIAB] OR Fenoprofen[TIAB] OR fentiazac[TIAB] OR fepradinol[TIAB] OR Feprazone[TIAB] OR “ferulic acid”[TIAB] OR



floctafenine[TIAB] OR flosulide[TIAB] OR flunixin[TIAB] OR “flunixin meglumine”[TIAB] OR flunoxaprofen[TIAB] OR fluproquazone[TIAB] OR Flurbiprofen[TIAB] OR “flurbiprofen axetil”[TIAB] OR glucametacin[TIAB] OR guacetisal[TIAB] OR helenalin[TIAB] OR heliodermin[TIAB] OR hemodes[TIAB] OR higenamine[TIAB] OR Ibuprofen[TIAB] OR ibuproxam[TIAB] OR icatibant[TIAB] OR indobufen[TIAB] OR Indomethacin[TIAB] OR Indoprofen[TIAB] OR iodoantipyrine[TIAB] OR isoxicam[TIAB] OR kebusone[TIAB] OR Ketoprofen[TIAB] OR “ketoprofen lysine”[TIAB] OR Ketorolac[TIAB] OR licofelone[TIAB] OR lisofylline[TIAB] OR obenzarit[TIAB] OR lonazolac[TIAB] OR lornoxicam[TIAB] OR loxoprofen[TIAB] OR lumiracoxib[TIAB] OR “Magnesium Salicylate”[TIAB] OR magnolol[TIAB] OR manoalide[TIAB] OR Masoprocol[TIAB] OR “Meclofenamic Acid”[TIAB] OR “Mefenamic Acid”[TIAB] OR Meloxicam[TIAB] OR Mesalamine[TIAB] OR mizoribine[TIAB] OR mofebutazone[TIAB] OR mofezolac[TIAB] OR leucine[TIAB] OR Nabumetone[TIAB] OR nafamostat[TIAB] OR Naproxen[TIAB] OR Nebacetin[TIAB] OR nepafenac[TIAB] OR nifenazone[TIAB] OR “Niflumic Acid”[TIAB] OR nimesulide[TIAB] OR nitroaspirin[TIAB] OR “Olopatadine Hydrochloride”[TIAB] OR olsalazine[TIAB] OR olvanil[TIAB] OR “oren gedoku to”[TIAB] OR orgotein[TIAB] OR Oxaprozin[TIAB] OR Oxyphenbutazone[TIAB] OR almidrol[TIAB] OR parecoxib[TIAB] OR parthenolide[TIAB] OR peoniflorin[TIAB] OR phenidone[TIAB] OR Phenylbutazone[TIAB] OR pimecrolimus[TIAB] OR pifrenidone[TIAB] OR Piroxicam[TIAB] OR pirprofen[TIAB] OR proglumetacin[TIAB] OR propacetamol[TIAB] OR propionylcarnitine[TIAB] OR propyphenazone[TIAB] OR proquazone[TIAB] OR pyranoprofen[TIAB] OR pyrazolone[TIAB] OR pyrogenal[TIAB] OR Resveratrol[TIAB] OR RNS60[TIAB] OR rofecoxib[TIAB] OR “rosmarinic acid”[TIAB] OR Rumalon[TIAB] OR “saiko-keishi-to”[TIAB] OR saikosaponin[TIAB] OR salicin[TIAB] OR salicylamide[TIAB] OR Salicylates[TIAB] OR “salicylsalicylic acid”[TIAB] OR semapimod[TIAB] OR seratrodast[TIAB] OR serratiopeptidase[TIAB] OR shikonin[TIAB] OR sinapaldehyde[TIAB] OR “Sodium Salicylate”[TIAB] OR Sulfasalazine[TIAB] OR Sulindac[TIAB] OR “sulindac sulfide”[TIAB] OR “sulindac sulfone”[TIAB] OR Suprofen[TIAB] OR suxibuzone[TIAB] OR tanshinone[TIAB] OR taxifolin[TIAB] OR tenidap[TIAB] OR tenoxicam[TIAB] OR tepoxalin[TIAB] OR “tiaprofenic acid”[TIAB] OR tiaramide[TIAB] OR tinoridine[TIAB] OR “tolfenamic acid”[TIAB] OR Tolmetin[TIAB] OR “tramadol, dexketoprofen drug combination”[TIAB] OR tranilast[TIAB] OR tribenoside[TIAB] OR “ursolic acid”[TIAB] OR valdecoxib[TIAB] OR zileuton[TIAB] OR zomepirac[TIAB] OR deflazacort[TIAB] OR “alclometasone dipropionate”[TIAB] OR amcinonide[TIAB] OR Beclomethasone[TIAB] OR Betamethasone[TIAB] OR Budesonide[TIAB] OR ciclesonide[TIAB] OR Clobetasol[TIAB] OR “clobetasone butyrate”[TIAB] OR clocortolone[TIAB] OR Desoximetasone[TIAB] OR Dexamethasone[TIAB] OR “dichlorisone acetate”[TIAB] OR

diflorasone[TIAB] OR Diflucortolone[TIAB] OR difluprednate[TIAB] OR “drocinonide phosphate potassium”[TIAB] OR Flumethasone[TIAB] OR “Fluocinolone Acetonide”[TIAB] OR Fluocinonide[TIAB] OR “fluocortin butyl ester”[TIAB] OR Fluocortolone[TIAB] OR Fluorometholone[TIAB] OR “fluperolone acetate”[TIAB] OR “fluprednidene acetate”[TIAB] OR Fluprednisolone[TIAB] OR Flurandrenolone[TIAB] OR “Fluticasone-Salmeterol Drug Combination”[TIAB] OR halometasone[TIAB] OR medrysone[TIAB] OR “Melengestrol Acetate”[TIAB] OR Methylprednisolone[TIAB] OR Paramethasone[TIAB] OR prednicarbate[TIAB] OR Prednisolone[TIAB] OR Prednisone[TIAB] OR rimexolone[TIAB] OR terofenamate[TIAB] OR “Tobramycin, Dexamethasone Drug Combination”[TIAB] OR Triamcinolone[TIAB] 403472

8. 4-7/OR 630033

9. 3 AND 8 2385

10. 9 NOT ("review"[Publication Type] OR "review literature as topic"[MeSH Terms]) 1893

11. 10 NOT ("animals"[MeSH Terms] NOT ("humans"[MeSH Terms] AND "animals"[MeSH Terms])) 1765

EMBASE

1. 'gout'/exp 23415

2. Gout:ab,ti OR Gouts:ab,ti OR Gouty:ab,ti 19126

3. 1 or 2 26480

4. 'colchicine'/exp OR 'nonsteroid antiinflammatory agent'/exp OR 'glucocorticoid'/exp 1372595

5. colchicine:ab,ti OR demecolcine:ab,ti OR colchamine:ab,ti OR colcemide:ab,ti OR colcemid:ab,ti OR lumicolchicines:ab,ti OR nsaid:ab,ti OR aceclofenac:ab,ti OR falcol:ab,ti OR 'falcol difucrem':ab,ti OR 'clanza cr':ab,ti OR preservex:ab,ti OR biofenac:ab,ti OR sanein:ab,ti OR beofenac:ab,ti OR aital:ab,ti OR bristaflam:ab,ti OR gerbin:ab,ti OR diclofenac:ab,ti OR naproxen:ab,ti OR ibuprofen:ab,ti OR zaltoprofen:ab,ti OR indomethacin:ab,ti OR

celecoxib:ab,ti OR nabumeton:ab,ti 119309

6. aceclofenac:ab,ti OR acemetacin:ab,ti OR 'acetaminophen':ab,ti OR acetosyringone:ab,ti OR acetovanillone:ab,ti OR 'acetylsalicylic acid lysinate':ab,ti OR adapalene:ab,ti OR alclofenac:ab,ti OR alminoprofen:ab,ti OR amiprilose:ab,ti OR ampyrone:ab,ti OR 'amylase, phosphates, proteases drug combinations':ab,ti OR andrographolide:ab,ti OR anisodamine:ab,ti OR anisodine:ab,ti OR 'antiflammin p2':ab,ti OR antipyrine:ab,ti OR apazone:ab,ti OR apremilast:ab,ti OR arteparon:ab,ti OR arthrotec:ab,ti OR aspirin:ab,ti OR atrinositol:ab,ti OR azulene:ab,ti OR baicalin:ab,ti OR balsalazide:ab,ti OR bendazac:ab,ti OR benorilate:ab,ti OR benoxaprofen:ab,ti OR benzobarbital:ab,ti OR berbamine:ab,ti OR 'betulinic acid':ab,ti OR bevonium:ab,ti OR 'biphenylacetic acid':ab,ti OR boldine:ab,ti OR 'boswellic acid':ab,ti OR bromfenac:ab,ti OR bucillamine:ab,ti OR bufexamac:ab,ti OR bumadizone:ab,ti OR butibufen:ab,ti OR 'carbaspirin calcium':ab,ti OR carprofen:ab,ti OR caryophyllene:ab,ti OR castanospermine:ab,ti OR celecoxib:ab,ti OR cepharanthine:ab,ti OR 'chloroquine diphosphate':ab,ti OR 'choline magnesium trisalicylate':ab,ti OR chrysarobin:ab,ti OR clonixin:ab,ti OR curcumin:ab,ti OR dauricine:ab,ti OR 'dexketoprofen trometamol':ab,ti OR diclofenac:ab,ti OR 'diclofenac hydroxyethylpyrrolidine':ab,ti OR difenpiramide:ab,ti OR diflunisal:ab,ti OR dimephosphon:ab,ti OR dipyrone:ab,ti OR diucifon:ab,ti OR droxicam:ab,ti OR ebselen:ab,ti OR ecallantide:ab,ti OR eltenac:ab,ti OR 'enfenamic acid':ab,ti OR epirizole:ab,ti OR etanercept:ab,ti OR ethenzamide:ab,ti OR ethonium:ab,ti OR etodolac:ab,ti OR etofenamate:ab,ti OR etoricoxib:ab,ti OR 'evening primrose oil':ab,ti OR 'fenamic acid':ab,ti OR fenbufen:ab,ti OR fenclofenac:ab,ti OR fenflumizole:ab,ti OR fenoprofen:ab,ti OR fentiazac:ab,ti OR fepradinol:ab,ti OR feprazone:ab,ti OR 'ferulic acid':ab,ti OR floctafenine:ab,ti OR flosulide:ab,ti OR flunixin:ab,ti OR 'flunixin meglumine':ab,ti OR flunoxaprofen:ab,ti OR fluproquazone:ab,ti OR flurbiprofen:ab,ti OR 'flurbiprofen axetil':ab,ti OR glucametacin:ab,ti OR guacetisal:ab,ti OR helenalin:ab,ti OR heliodermin:ab,ti OR hemodes:ab,ti OR higenamine:ab,ti OR ibuprofen:ab,ti OR ibuproxam:ab,ti OR icatibant:ab,ti OR indobufen:ab,ti OR indomethacin:ab,ti OR indoprofen:ab,ti OR iodoantipyrine:ab,ti OR isoxicam:ab,ti OR kebuzone:ab,ti OR ketoprofen:ab,ti OR 'ketoprofen lysine':ab,ti OR ketorolac:ab,ti OR licofelone:ab,ti OR lisofylline:ab,ti OR obenzarit:ab,ti OR lonazolac:ab,ti OR lornoxicam:ab,ti OR loxoprofen:ab,ti OR lumiracoxib:ab,ti OR 'magnesium salicylate':ab,ti OR magnolol:ab,ti OR manoalide:ab,ti OR masoprocol:ab,ti OR 'meclofenamic acid':ab,ti OR 'mefenamic acid':ab,ti OR meloxicam:ab,ti OR mesalamine:ab,ti OR mizoribine:ab,ti OR mofebutazone:ab,ti OR mofezolac:ab,ti OR leucine:ab,ti OR nabumetone:ab,ti OR nafamostat:ab,ti OR naproxen:ab,ti OR nebacetin:ab,ti OR nepafenac:ab,ti OR nifenazone:ab,ti OR 'niflumic acid':ab,ti OR nimesulide:ab,ti OR nitroaspirin:ab,ti OR 'olopatadine hydrochloride':ab,ti OR olsalazine:ab,ti OR olvanil:ab,ti OR 'oren gedoku to':ab,ti OR

orgotein:ab,ti OR oxaprozin:ab,ti OR oxyphenbutazone:ab,ti OR almidrol:ab,ti OR parecoxib:ab,ti OR parthenolide:ab,ti OR peoniflorin:ab,ti OR phenidone:ab,ti OR phenylbutazone:ab,ti OR pimecrolimus:ab,ti OR pirfenidone:ab,ti OR piroxicam:ab,ti OR pirprofen:ab,ti OR proglumetacin:ab,ti OR propacetamol:ab,ti OR propionylcarnitine:ab,ti OR propyphenazone:ab,ti OR proquazone:ab,ti OR pyranoprofen:ab,ti OR pyrazolone:ab,ti OR pyrogenal:ab,ti OR resveratrol:ab,ti OR rns60:ab,ti OR rofecoxib:ab,ti OR 'rosmarinic acid':ab,ti OR rumalon:ab,ti OR 'saiko-keishi-to':ab,ti OR saikosaponin:ab,ti OR salicin:ab,ti OR salicylamide:ab,ti OR salicylates:ab,ti OR 'salicylsalicylic acid':ab,ti OR semapimod:ab,ti OR seratrodist:ab,ti OR serratiopeptidase:ab,ti OR shikonin:ab,ti OR sinapaldehyde:ab,ti OR 'sodium salicylate':ab,ti OR sulfasalazine:ab,ti OR sulindac:ab,ti OR 'sulindac sulfide':ab,ti OR 'sulindac sulfone':ab,ti OR suprofen:ab,ti OR suxibuzone:ab,ti OR tanshinone:ab,ti OR taxifolin:ab,ti OR tenidap:ab,ti OR tenoxicam:ab,ti OR tepoxalin:ab,ti OR 'tiaprofenic acid':ab,ti OR tiaramide:ab,ti OR tinoridine:ab,ti OR 'tolfenamic acid':ab,ti OR tolmetin:ab,ti OR 'tramadol, dexketoprofen drug combination':ab,ti OR tranilast:ab,ti OR tribenoside:ab,ti OR 'ursolic acid':ab,ti OR valdecoxib:ab,ti OR zileuton:ab,ti OR zomepirac:ab,ti OR deflazacort:ab,ti OR 'alclometasone dipropionate':ab,ti OR amcinonide:ab,ti OR beclomethasone:ab,ti OR betamethasone:ab,ti OR budesonide:ab,ti OR ciclesonide:ab,ti OR clobetasol:ab,ti OR 'clobetasone butyrate':ab,ti OR clocortolone:ab,ti OR desoximetasone:ab,ti OR dexamethasone:ab,ti OR 'dichlorisone acetate':ab,ti OR diflorasone:ab,ti OR diflucortolone:ab,ti OR difluprednate:ab,ti OR 'drocinonide phosphate potassium':ab,ti OR flumethasone:ab,ti OR 'fluocinolone acetonide':ab,ti OR fluocinonide:ab,ti OR 'fluocortin butyl ester':ab,ti OR fluocortolone:ab,ti OR fluorometholone:ab,ti OR 'fluperolone acetate':ab,ti OR 'fluprednidene acetate':ab,ti OR fluprednisolone:ab,ti OR flurandrenolone:ab,ti OR 'fluticasone-salmeterol drug combination':ab,ti OR halometasone:ab,ti OR medrysone:ab,ti OR 'melengestrol acetate':ab,ti OR methylprednisolone:ab,ti OR paramethasone:ab,ti OR prednicarbate:ab,ti OR prednisolone:ab,ti OR prednisone:ab,ti OR rimexolone:ab,ti OR terofenamate:ab,ti OR 'tobramycin, dexamethasone drug combination':ab,ti OR triamcinolone:ab,ti 554702

7. 4-6/OR 1561242

8. 3 AND 7 6830

9. 8 NOT ('animal cell'/de OR 'animal experiment'/de OR 'animal model'/de OR 'animal tissue'/de OR 'human cell'/de OR 'human tissue'/de OR 'in vitro study'/de OR 'nonhuman'/de) 5537

10. 9 NOT ('conference review'/it OR 'review'/it) 4545

KMbase

1. ([ALL=Gout] OR [ALL=Gouty] OR [ALL=Gouts] OR [ALL=통풍]) 494

2. (((((((((((([ALL=항염증] OR [ALL=colchicine]) OR [ALL=NSAID]) OR [ALL=acefenac]) OR [ALL=diclofenac]) OR [ALL=naproxen]) OR [ALL=ibuprofen]) OR [ALL=zaltoprofen]) OR [ALL=indomethacin]) OR [ALL=celecoxib]) OR [ALL=nabumeton]) OR [ALL=glucocorticoid]) OR [ALL=hydrocortisone]) OR [ALL=triamcinolone]) OR [ALL=prednisolone]) OR [ALL=methylprednisolone]) 6426

3. 1 AND 2 44

COCHRANE

1. (Gout OR Gouts OR Gouty):ab,ti,kw 1448

2. MeSH descriptor:[gout] explode all trees 315

3. 1 OR 2 1487

5. (colchicine OR Demecolcine OR Colchamine OR Colcemide OR Colcemid OR Lumicolchicines OR NSAID OR aceclofenac OR Falcol OR “Falcol Difucem” OR “Clanza CR” OR Preservex OR Biofenac OR Sanein OR Beofenac OR Aital OR Bristaflam OR Gerbin OR Diclofenac OR diclofenac OR naproxen OR ibuprofen OR zaltoprofen OR indomethacin OR celecoxib OR nabumeton OR aceclofenac OR acemetacin OR “acetaminophen” OR

acetosyringone OR acetovanillone OR “acetylsalicylic acid lysinate” OR Adapalene OR alclofenac OR alminoprofen OR amiprilose OR Ampyrone OR “amylase, phosphates, proteases drug combinations” OR andrographolide OR anisodamine OR anisodine OR “antiflammin P2” OR Antipyrine OR Apazone OR apremilast OR Arteparon OR Arthrotec OR Aspirin OR atrinositol OR azulene OR baicalin OR balsalazide OR bendazac OR benorilate OR benoxaprofen OR benzobarbital OR berbamine OR “betulinic acid” OR bevonium OR “biphenylacetic acid” OR boldine OR “boswellic acid” OR bromfenac OR bucillamine OR Bufexamac OR bumadizone OR butibufen OR “carbaspirin calcium” OR carprofen OR caryophyllene OR castanospermine OR Celecoxib OR cepharanthine OR “chloroquine diphosphate” OR “choline magnesium trisalicylate” OR chrysarobin OR Clonixin OR Curcumin OR dauricine OR “dexketoprofen trometamol” OR Diclofenac OR “diclofenac hydroxyethylpyrrolidine” OR difenpiramide OR Diflunisal OR dimephosphon OR Dipyrone OR diucifon OR droxicam OR ebselen OR ecallantide OR eltenac OR “enfenamic acid” OR Epirizole OR Etanercept OR ethenzamide OR Ethonium OR Etodolac OR etofenamate OR Etoricoxib OR “evening primrose oil” OR “fenamic acid” OR fenbufen OR fenclofenac OR fenflumizole OR Fenoprofen OR fentiazac OR fepradinol OR Feprazone OR “ferulic acid” OR floctafenine OR flosulide OR flunixin OR “flunixin meglumine” OR flunoxaprofen OR fluproquazone OR Flurbiprofen OR “flurbiprofen axetil” OR glucametacin OR guacetisal OR helenalin OR heliodermin OR hemodes OR higenamine OR Ibuprofen OR ibuproxam OR icatibant OR indobufen OR Indomethacin OR Indoprofen OR iodoantipyrine OR isoxicam OR kebuzone OR Ketoprofen OR “ketoprofen lysine” OR Ketorolac OR licofelone OR lisofylline OR obenzarit OR lonazolac OR lornoxicam OR loxoprofen OR lumiracoxib OR “Magnesium Salicylate” OR magnolol OR manolide OR Masoprocol OR “Meclofenamic Acid” OR “Mefenamic Acid” OR Meloxicam OR Mesalamine OR mizoribine OR mofebutazone OR mofezolac OR leucine OR Nabumetone OR nafamostat OR Naproxen OR Nebacetin OR nepafenac OR nifenazone OR “Niflumic Acid” OR nimesulide OR nitroaspirin OR “Olopatadine Hydrochloride” OR olsalazine OR olvanil OR “oren gedoku to” OR orgotein OR Oxaprozin OR Oxyphenbutazone OR almidrol OR parecoxib OR parthenolide OR peoniflorin OR phenidone OR Phenylbutazone OR pimecrolimus OR pirfenidone OR Piroxicam OR pirprofen OR proglumetacin OR propacetamol OR propionylcarnitine OR propyphenazone OR proquazone OR pyranoprofen OR pyrazolone OR pyrogenal OR Resveratrol OR RNS60 OR rofecoxib OR “rosmarinic acid” OR Rumalon OR “saiko-keishi-to” OR saikosaponin OR salicin OR salicylamide OR Salicylates OR “salicylsalicylic acid” OR semapimod OR seratrodist OR serratiopeptidase OR shikonin OR sinapaldehyde OR “Sodium Salicylate” OR Sulfasalazine OR Sulindac OR “sulindac sulfide” OR “sulindac sulfone” OR Suprofen OR suxibuzone OR tanshinone OR taxifolin OR tenidap OR tenoxicam OR tepoxalin OR “tiaprofenic acid” OR tiaramide OR tinoridine OR “tolfenamic acid” OR Tolmetin OR “tramadol, dexketoprofen

drug combination” OR tranilast OR tribenoside OR “ursolic acid” OR valdecoxib OR zileuton OR zomepirac OR deflazacort OR “alclometasone dipropionate” OR amcinonide OR Beclomethasone OR Betamethasone OR Budesonide OR ciclesonide OR Clobetasol OR “clobetasone butyrate” OR clocortolone OR Desoximetasone OR Dexamethasone OR “dichlorisone acetate” OR diflorasone OR Diflucortolone OR difluprednate OR “drocinonide phosphate potassium” OR Flumethasone OR “Fluocinolone Acetonide” OR Fluocinonide OR “fluocortin butyl ester” OR Fluocortolone OR Fluorometholone OR “fluperolone acetate” OR “fluprednidene acetate” OR Fluprednisolone OR Flurandrenolone OR “Fluticasone-Salmeterol Drug Combination” OR halometasone OR medrysone OR “Melengestrol Acetate” OR Methylprednisolone OR Paramethasone OR prednicarbate OR Prednisolone OR Prednisone OR rimexolone OR terofenamate OR “Tobramycin, Dexamethasone Drug Combination” OR Triamcinolone):ab,ti,kw 89344

6. 4 AND 5 393

7. 6/trials 377

### 3) 만성콩팥병 – KQ9

MEDLINE

1. "Hyperuricemia"[Mesh] 3319
2. "Hyperuricemia"[TW] 7617
3. ("Hyperuricemia"[Mesh]) OR "Hyperuricemia"[TW] 7617
4. "Renal Insufficiency, Chronic"[Mesh] 110421
5. "Renal Insufficiency, Chronic"[TIAB] OR "Chronic Renal Insufficiencies"[TIAB] OR "Renal Insufficiencies, Chronic"[TIAB] OR "Chronic Renal Insufficiency"[TIAB] OR "Kidney Insufficiency, Chronic"[TIAB] OR "Chronic Kidney Insufficiency"[TIAB] OR "Chronic Kidney Insufficiencies"[TIAB] OR "Kidney Insufficiencies, Chronic"[TIAB] OR "Chronic Kidney Diseases"[TIAB] OR "Chronic Kidney Disease"[TIAB] OR "Disease, Chronic

Kidney"[TIAB] OR "Diseases, Chronic Kidney"[TIAB] OR "Kidney Disease, Chronic"[TIAB] OR "Kidney Diseases, Chronic"[TIAB] OR "Chronic Renal Diseases"[TIAB] OR "Chronic Renal Disease"[TIAB] OR "Disease, Chronic Renal"[TIAB] OR "Diseases, Chronic Renal"[TIAB] OR "Renal Disease, Chronic"[TIAB] OR "Renal Diseases, Chronic"[TIAB] OR "CKD"[TIAB] OR "CKD stage 3"[TIAB] OR "CKD stage 4"[TIAB] 56909

6. ("Renal Insufficiency, Chronic"[Mesh]) OR (("Renal Insufficiency, Chronic"[TIAB] OR "Chronic Renal Insufficiencies"[TIAB] OR "Renal Insufficiencies, Chronic"[TIAB] OR "Chronic Renal Insufficiency"[TIAB] OR "Kidney Insufficiency, Chronic"[TIAB] OR "Chronic Kidney Insufficiency"[TIAB] OR "Chronic Kidney Insufficiencies"[TIAB] OR "Kidney Insufficiencies, Chronic"[TIAB] OR "Chronic Kidney Diseases"[TIAB] OR "Chronic Kidney Disease"[TIAB] OR "Disease, Chronic Kidney"[TIAB] OR "Diseases, Chronic Kidney"[TIAB] OR "Kidney Disease, Chronic"[TIAB] OR "Kidney Diseases, Chronic"[TIAB] OR "Chronic Renal Diseases"[TIAB] OR "Chronic Renal Disease"[TIAB] OR "Disease, Chronic Renal"[TIAB] OR "Diseases, Chronic Renal"[TIAB] OR "Renal Disease, Chronic"[TIAB] OR "Renal Diseases, Chronic"[TIAB] OR "CKD"[TIAB] OR "CKD stage 3"[TIAB] OR "CKD stage 4"[TIAB])) 138471

7. #3 AND #6 823

8. "Uric Acid"[Mesh] 23911

9. "Uric Acid"[TIAB] OR "Acid, Uric"[TIAB] OR "2,6,8-Trihydroxypurine"[TIAB] OR "Trioxopurine"[TIAB] OR "Potassium Urate"[TIAB] OR "Urate, Potassium"[TIAB] OR "Urate"[TIAB] OR "Ammonium Acid Urate"[TIAB] OR "Acid Urate, Ammonium"[TIAB] OR "Urate, Ammonium Acid"[TIAB] OR "Sodium Urate Monohydrate"[TIAB] OR "Monohydrate, Sodium Urate"[TIAB] OR "Urate Monohydrate, Sodium"[TIAB] OR "Monosodium Urate Monohydrate"[TIAB] OR "Monohydrate, Monosodium Urate"[TIAB] OR "Urate Monohydrate, Monosodium"[TIAB] OR "Sodium Acid Urate Monohydrate"[TIAB] OR "Sodium Urate"[TIAB] OR "Urate, Sodium"[TIAB] OR "Monosodium Urate"[TIAB] OR "Urate, Monosodium"[TIAB] OR "Sodium Acid Urate"[TIAB] OR "Acid Urate, Sodium"[TIAB] OR "Urate, Sodium Acid"[TIAB] OR "Uric Acid Lowering Agents"[TIAB] OR "Urate lowering therapy"[TIAB] OR "ULT"[TIAB] 32549

10. "Uricosuric Agents"[Mesh] 1211

11. "Uricosuric Agents"[TIAB] OR "Agents, Uricosuric"[TIAB] 198

12. "Uricosuric Agents" [Pharmacological Action] 6655



13. "Allopurinol"[Mesh] OR "Xanthine Oxidase"[Mesh] OR "Febuxostat"[Mesh] OR "Benzbromarone"[Mesh] OR "Uricosuric Agents" [Pharmacological Action] 20257
14. "Probenecid"[MeSH] OR "Apazone"[MeSH] OR "Benzbromarone"[MeSH] OR "benziodarone"[Supplementary Concept] OR "Halofenate"[MeSH] OR "indacrinone"[Supplementary Concept] OR "Ilesinurad"[Supplementary Concept] OR "Probenecid"[MeSH] OR "Sulfinpyrazone"[MeSH] OR "Ticrynafen"[MeSH] OR "traxanox"[Supplementary Concept] OR "Zoxazolamine"[MeSH] 5769
15. "allopurinol"[TIAB] OR "Xanthine Oxidase"[TIAB] OR "Uribenz"[TIAB] OR "Allopurin"[TIAB] OR "Allorin"[TIAB] OR "Allpargin"[TIAB] OR "Allural"[TIAB] OR "Pan Quimica"[TIAB] OR "Apulonga"[TIAB] OR "Apurin"[TIAB] OR "Atisuril"[TIAB] OR "Bleminol"[TIAB] OR "Caplenal"[TIAB] OR "Capurate"[TIAB] OR "Cellidrin"[TIAB] OR "Embarin"[TIAB] OR "Suspendol"[TIAB] OR "Foligan"[TIAB] OR "Hamarin"[TIAB] OR "Lopurin"[TIAB] OR "Lysuron"[TIAB] OR "Jenapurinol"[TIAB] OR "Milurit"[TIAB] OR "Milurite"[TIAB] OR "Novopurool"[TIAB] OR "Uripurinol"[TIAB] OR "Urosin"[TIAB] OR "Urtias"[TIAB] OR "Xanthomax"[TIAB] OR "Uridocid"[TIAB] OR "Xanturic"[TIAB] OR "Zygout"[TIAB] OR "Zyloprim"[TIAB] OR "Zyloric"[TIAB] OR "Pureduct"[TIAB] OR "Purinol"[TIAB] OR "Progout"[TIAB] OR "Remid"[TIAB] OR "Rimapurinol"[TIAB] OR "Antigout"[TIAB] OR "Antihyperuricemics"[TIAB] OR "Roucol"[TIAB] OR "Tipuric"[TIAB] OR "Allohexal"[TIAB] OR "Allohexan"[TIAB] OR "Alloprin"[TIAB] OR "Uloric"[TIAB] OR "febuxostat"[TIAB] OR "benzbromarone"[TIAB] 15941
16. (((((((("Uric Acid"[Mesh]) OR ("Uric Acid"[TIAB] OR "Acid, Uric"[TIAB] OR "2,6,8-Trihydroxypurine"[TIAB] OR "Trioxopurine"[TIAB] OR "Potassium Urate"[TIAB] OR "Urate, Potassium"[TIAB] OR "Urate"[TIAB] OR "Ammonium Acid Urate"[TIAB] OR "Acid Urate, Ammonium"[TIAB] OR "Urate, Ammonium Acid"[TIAB] OR "Sodium Urate Monohydrate"[TIAB] OR "Monohydrate, Sodium Urate"[TIAB] OR "Urate Monohydrate, Sodium"[TIAB] OR "Monosodium Urate Monohydrate"[TIAB] OR "Monohydrate, Monosodium Urate"[TIAB] OR "Urate Monohydrate, Monosodium"[TIAB] OR "Sodium Acid Urate Monohydrate"[TIAB] OR "Sodium Urate"[TIAB] OR "Urate, Sodium"[TIAB] OR "Monosodium Urate"[TIAB] OR "Urate, Monosodium"[TIAB] OR "Sodium Acid Urate"[TIAB] OR "Acid Urate, Sodium"[TIAB] OR "Urate, Sodium Acid"[TIAB] OR "Uric Acid Lowering Agents"[TIAB] OR "Urate lowering therapy"[TIAB] OR "ULT"[TIAB]))) OR "Uricosuric Agents"[Mesh]) OR ("Uricosuric Agents"[TIAB] OR "Agents, Uricosuric"[TIAB]))) OR "Uricosuric Agents" [Pharmacological Action]) OR (("Allopurinol"[Mesh] OR "Xanthine Oxidase"[Mesh] OR "Febuxostat"[Mesh] OR "Benzbromarone"[Mesh] OR "Uricosuric Agents" [Pharmacological Action])) OR (("Probenecid"[MeSH]

OR "Apazone"[MeSH] OR "Benzbromarone"[MeSH] OR "benziodarone"[Supplementary Concept] OR "Halofenate"[MeSH] OR "indacrinone"[Supplementary Concept] OR "lesinurad"[Supplementary Concept] OR "Probenecid"[MeSH] OR "Sulfinpyrazone"[MeSH] OR "Ticrynafen"[MeSH] OR "traxanox"[Supplementary Concept] OR "Zoxazolamine"[MeSH])) OR (("allopurinol"[TIAB] OR "Xanthine Oxidase"[TIAB] OR "Uribenz"[TIAB] OR "Allopurin"[TIAB] OR "Allorin"[TIAB] OR "Allpargin"[TIAB] OR "Allural"[TIAB] OR "Pan Quimica"[TIAB] OR "Apulonga"[TIAB] OR "Apurin"[TIAB] OR "Atisuril"[TIAB] OR "Bleminol"[TIAB] OR "Caplenal"[TIAB] OR "Capurate"[TIAB] OR "Cellidrin"[TIAB] OR "Embarin"[TIAB] OR "Suspendol"[TIAB] OR "Foligan"[TIAB] OR "Hamarin"[TIAB] OR "Lopurin"[TIAB] OR "Lysuron"[TIAB] OR "Jenapurinol"[TIAB] OR "Milurit"[TIAB] OR "Milurite"[TIAB] OR "Novopurol"[TIAB] OR "Uripurinol"[TIAB] OR "Urosin"[TIAB] OR "Urtias"[TIAB] OR "Xanthomax"[TIAB] OR "Uridocid"[TIAB] OR "Xanturic"[TIAB] OR "Zygout"[TIAB] OR "Zyloprim"[TIAB] OR "Zyloric"[TIAB] OR "Pureduct"[TIAB] OR "Purinol"[TIAB] OR "Progout"[TIAB] OR "Remid"[TIAB] OR "Rimapurinol"[TIAB] OR "Antigout"[TIAB] OR "Antihyperuricemics"[TIAB] OR "Roucol"[TIAB] OR "Tipuric"[TIAB] OR "Allohexal"[TIAB] OR "Allohexan"[TIAB] OR "Alloprin"[TIAB] OR "Uloric"[TIAB] OR "febuxostat"[TIAB] OR "benzbromarone"[TIAB])) 61804

17. #7 AND #16 612

18. #17 NOT "review"[Publication Type] OR "review literature as topic"[MeSH] 476

19. #18 NOT ("animals"[MeSH] NOT "humans"[MeSH]) 453

EMBASE

1. 'hyperuricemia'/exp 15020

2. hyperuricemia':ab,ti,kw,de OR 'hyperuricacidaemia':ab,ti OR 'hyperuricacidemia':ab,ti OR 'hyperuricaemia':ab,ti OR 'senile hyperuricaemia':ab,ti OR 'senile hyperuricemia':ab,ti 18335

3. 'hyperuricemia'/exp OR ('hyperuricemia':ab,ti,kw,de OR 'hyperuricacidaemia':ab,ti OR 'hyperuricacidemia':ab,ti OR 'hyperuricaemia':ab,ti OR 'senile hyperuricaemia':ab,ti OR 'senile hyperuricemia':ab,ti) 18335

4. 'chronic kidney failure'/exp 142125

5. 'renal insufficiency, chronic':ab,ti OR 'chronic renal insufficiencies':ab,ti OR 'renal insufficiencies, chronic':ab,ti OR 'chronic renal insufficiency':ab,ti OR 'kidney insufficiency, chronic':ab,ti OR 'chronic kidney insufficiency':ab,ti OR 'chronic kidney insufficiencies':ab,ti OR 'kidney insufficiencies, chronic':ab,ti OR 'chronic kidney diseases':ab,ti OR 'chronic kidney disease':ab,ti OR 'disease, chronic kidney':ab,ti OR 'diseases, chronic kidney':ab,ti OR 'kidney disease, chronic':ab,ti OR 'kidney diseases, chronic':ab,ti OR 'chronic renal diseases':ab,ti OR 'chronic renal disease':ab,ti OR 'disease, chronic renal':ab,ti OR 'diseases, chronic renal':ab,ti OR 'renal disease, chronic':ab,ti OR 'renal diseases, chronic':ab,ti OR 'ckd':ab,ti OR 'ckd stage 3':ab,ti OR 'ckd stage 4':ab,ti 89653
6. 'chronic kidney failure'/exp OR ('renal insufficiency, chronic':ab,ti OR 'chronic renal insufficiencies':ab,ti OR 'renal insufficiencies, chronic':ab,ti OR 'chronic renal insufficiency':ab,ti OR 'kidney insufficiency, chronic':ab,ti OR 'chronic kidney insufficiency':ab,ti OR 'chronic kidney insufficiencies':ab,ti OR 'kidney insufficiencies, chronic':ab,ti OR 'chronic kidney diseases':ab,ti OR 'chronic kidney disease':ab,ti OR 'disease, chronic kidney':ab,ti OR 'diseases, chronic kidney':ab,ti OR 'kidney disease, chronic':ab,ti OR 'kidney diseases, chronic':ab,ti OR 'chronic renal diseases':ab,ti OR 'chronic renal disease':ab,ti OR 'disease, chronic renal':ab,ti OR 'diseases, chronic renal':ab,ti OR 'renal disease, chronic':ab,ti OR 'renal diseases, chronic':ab,ti OR 'ckd':ab,ti OR 'ckd stage 3':ab,ti OR 'ckd stage 4':ab,ti) 163445
7. #3 AND #6 1759
8. 'uric acid'/exp 43125
9. 'uric acid':ab,ti OR 'acid, uric':ab,ti OR '2,6,8-trihydroxypurine':ab,ti OR 'trioxopurine':ab,ti OR 'potassium urate':ab,ti OR 'urate, potassium':ab,ti OR 'urate':ab,ti OR 'ammonium acid urate':ab,ti OR 'acid urate, ammonium':ab,ti OR 'urate, ammonium acid':ab,ti OR 'sodium urate monohydrate':ab,ti OR 'monohydrate, sodium urate':ab,ti OR 'urate monohydrate, sodium':ab,ti OR 'monosodium urate monohydrate':ab,ti OR 'monohydrate, monosodium urate':ab,ti OR 'urate monohydrate, monosodium':ab,ti OR 'sodium acid urate monohydrate':ab,ti OR 'sodium urate':ab,ti OR 'urate, sodium':ab,ti OR 'monosodium urate':ab,ti OR 'urate, monosodium':ab,ti OR 'sodium acid urate':ab,ti OR 'acid urate, sodium':ab,ti OR 'urate, sodium acid':ab,ti OR 'uric acid lowering agents':ab,ti OR 'urate lowering therapy':ab,ti OR 'ult':ab,ti 45315
10. 'uricosuric agent'/exp 16917
11. 'uricosuric agents':ab,ti OR 'agents, uricosuric':ab,ti 174
12. 'allopurinol'/exp OR 'xanthine oxidase'/exp OR 'febuxostat'/exp OR 'benzbromarone'/exp 34051

13. 'azapropazone'/exp OR 'benzbromarone'/exp OR 'benziodarone'/exp OR 'halofenate'/exp OR 'indacrinone'/exp OR 'lesinurad'/exp OR 'probenecid'/exp OR 'sulfipyrazone'/exp OR 'tienilic acid'/exp OR 'traxanox'/exp OR 'zoxazolamine'/exp 17266

14. 'allopurinol':ab,ti OR 'xanthine oxidase':ab,ti OR 'uribenz':ab,ti OR 'allopurin':ab,ti OR 'allorin':ab,ti OR 'allpargin':ab,ti OR 'allural':ab,ti OR 'pan quimica':ab,ti OR 'apulonga':ab,ti OR 'apurin':ab,ti OR 'atisuril':ab,ti OR 'bleminol':ab,ti OR 'caplenal':ab,ti OR 'capurate':ab,ti OR 'cellidrin':ab,ti OR 'embarin':ab,ti OR 'suspendol':ab,ti OR 'foligan':ab,ti OR 'hamarin':ab,ti OR 'lopurin':ab,ti OR 'lysuron':ab,ti OR 'jenapurinol':ab,ti OR 'milurit':ab,ti OR 'milurite':ab,ti OR 'novopurol':ab,ti OR 'uripurinol':ab,ti OR 'urosin':ab,ti OR 'urtias':ab,ti OR 'xanthomax':ab,ti OR 'uridocid':ab,ti OR 'xanturic':ab,ti OR 'zygout':ab,ti OR 'zyloprim':ab,ti OR 'zyloric':ab,ti OR 'pureduct':ab,ti OR 'purinol':ab,ti OR 'progout':ab,ti OR 'remid':ab,ti OR 'rimapurinol':ab,ti OR 'antigout':ab,ti OR 'antihyperuricemics':ab,ti OR 'roucol':ab,ti OR 'tipuric':ab,ti OR 'allohexal':ab,ti OR 'allohexan':ab,ti OR 'alloprin':ab,ti OR 'uloric':ab,ti OR 'febuxostat':ab,ti OR 'benzbromarone':ab,ti 20747

15. 'uric acid'/exp OR ('uric acid':ab,ti OR 'acid, uric':ab,ti OR '2,6,8-trihydroxypurine':ab,ti OR 'trioxopurine':ab,ti OR 'potassium urate':ab,ti OR 'urate, potassium':ab,ti OR 'urate':ab,ti OR 'ammonium acid urate':ab,ti OR 'acid urate, ammonium':ab,ti OR 'urate, ammonium acid':ab,ti OR 'sodium urate monohydrate':ab,ti OR 'monohydrate, sodium urate':ab,ti OR 'urate monohydrate, sodium':ab,ti OR 'monosodium urate monohydrate':ab,ti OR 'monohydrate, monosodium urate':ab,ti OR 'urate monohydrate, monosodium':ab,ti OR 'sodium acid urate monohydrate':ab,ti OR 'sodium urate':ab,ti OR 'urate, sodium':ab,ti OR 'monosodium urate':ab,ti OR 'urate, monosodium':ab,ti OR 'sodium acid urate':ab,ti OR 'acid urate, sodium':ab,ti OR 'urate, sodium acid':ab,ti OR 'uric acid lowering agents':ab,ti OR 'urate lowering therapy':ab,ti OR 'ult':ab,ti) OR 'uricosuric agent'/exp OR ('uricosuric agents':ab,ti OR 'agents, uricosuric':ab,ti) OR ('allopurinol'/exp OR 'xanthine oxidase'/exp OR 'febuxostat'/exp OR 'benzbromarone'/exp) OR ('azapropazone'/exp OR 'benzbromarone'/exp OR 'benziodarone'/exp OR 'halofenate'/exp OR 'indacrinone'/exp OR 'lesinurad'/exp OR 'probenecid'/exp OR 'sulfipyrazone'/exp OR 'tienilic acid'/exp OR 'traxanox'/exp OR 'zoxazolamine'/exp) OR ('allopurinol':ab,ti OR 'xanthine oxidase':ab,ti OR 'uribenz':ab,ti OR 'allopurin':ab,ti OR 'allorin':ab,ti OR 'allpargin':ab,ti OR 'allural':ab,ti OR 'pan quimica':ab,ti OR 'apulonga':ab,ti OR 'apurin':ab,ti OR 'atisuril':ab,ti OR 'bleminol':ab,ti OR 'caplenal':ab,ti OR 'capurate':ab,ti OR 'cellidrin':ab,ti OR 'embarin':ab,ti OR 'suspendol':ab,ti OR 'foligan':ab,ti OR 'hamarin':ab,ti OR 'lopurin':ab,ti OR 'lysuron':ab,ti OR 'jenapurinol':ab,ti OR 'milurit':ab,ti OR 'milurite':ab,ti OR 'novopurol':ab,ti OR 'uripurinol':ab,ti OR 'urosin':ab,ti OR 'urtias':ab,ti OR 'xanthomax':ab,ti OR 'uridocid':ab,ti OR 'xanturic':ab,ti OR 'zygout':ab,ti OR 'zyloprim':ab,ti OR 'zyloric':ab,ti OR 'pureduct':ab,ti OR 'purinol':ab,ti OR

'progout':ab,ti OR 'remid':ab,ti OR 'rimapurinol':ab,ti OR 'antigout':ab,ti OR 'antihyperuricemics':ab,ti OR 'roucol':ab,ti OR 'tipuric':ab,ti OR 'allohexal':ab,ti OR 'allohexan':ab,ti OR 'alloprin':ab,ti OR 'uloric':ab,ti OR 'febuxostat':ab,ti OR 'benzbromarone':ab,ti) 104078

16. #7 AND #15 1222

17. #16 NOT ('conference review'/it OR 'review'/it) 1022

18. #17 NOT ('animal cell'/de OR 'animal experiment'/de OR 'animal model'/de OR 'animal tissue'/de OR 'human cell'/de OR 'human tissue'/de OR 'in vitro study'/de OR 'nonhuman'/de) 775

#### KMBASE

1. [ALL=고요산혈증] OR [ALL=Hyperuricemia] OR [ALL=hyperuricacidaemiay] OR [ALL=hyperuricacidemia] OR [ALL=hyperuricaemia] OR [ALL=고요산 혈증] 263

2. [ALL=Chronic Kidney Disease] OR [ALL=Chronic Renal Disease] OR [ALL=만성 신질환] OR [ALL=만성신질환] 803

3. (([ALL=allopurinol] OR [ALL=febuxostat] OR [ALL=Xanthine Oxidase] OR [ALL=Benzbromarone] OR [ALL=알로푸리놀] OR [ALL=페부소스타즈] OR [ALL=Uric Acid] OR [ALL=요산] OR [ALL=Urate] OR [ALL=Uricosuric Agents]) OR [ALL=Uric Acid Lowering Agents] OR [ALL=Urate lowering therapy] OR [ALL=요산저하제]) 1720

4. #1 AND #2 AND #3 17

#### COCHRANE

1. [mh Hyperuricemia] 213

2. "Hyperuricemia":ti,ab,kw 1011

3. #1 OR #2 1011
4. [mh "Renal Insufficiency, Chronic"] 6088
5. "Renal Insufficiency, Chronic":ti,ab,kw OR "Chronic Renal Insufficiencies":ti,ab,kw OR "Renal Insufficiencies, Chronic":ti,ab,kw OR "Chronic Renal Insufficiency":ti,ab,kw OR "Kidney Insufficiency, Chronic":ti,ab,kw OR "Chronic Kidney Insufficiency":ti,ab,kw OR "Chronic Kidney Insufficiencies":ti,ab,kw OR "Kidney Insufficiencies, Chronic":ti,ab,kw OR "Chronic Kidney Diseases":ti,ab,kw OR "Chronic Kidney Disease":ti,ab,kw OR "Disease, Chronic Kidney":ti,ab,kw OR "Diseases, Chronic Kidney":ti,ab,kw OR "Kidney Disease, Chronic":ti,ab,kw OR "Kidney Diseases, Chronic":ti,ab,kw OR "Chronic Renal Diseases":ti,ab,kw OR "Chronic Renal Disease":ti,ab,kw OR "Disease, Chronic Renal":ti,ab,kw OR "Diseases, Chronic Renal":ti,ab,kw OR "Renal Disease, Chronic":ti,ab,kw OR "Renal Diseases, Chronic":ti,ab,kw OR "CKD":ti,ab,kw OR "CKD stage 3":ti,ab,kw OR "CKD stage 4":ti,ab,kw 8768
6. #4 OR #5 12166
7. #3 AND #6 115
8. [mh "Uric Acid"] 1084
9. "Uric Acid":ti,ab,kw OR "Acid, Uric":ti,ab,kw OR "2,6,8-Trihydroxypurine":ti,ab,kw OR "Trioxopurine":ti,ab,kw OR "Potassium Urate":ti,ab,kw OR "Urate, Potassium":ti,ab,kw OR "Urate":ti,ab,kw OR "Ammonium Acid Urate":ti,ab,kw OR "Acid Urate, Ammonium":ti,ab,kw OR "Urate, Ammonium Acid":ti,ab,kw OR "Sodium Urate Monohydrate":ti,ab,kw OR "Monohydrate, Sodium Urate":ti,ab,kw OR "Urate Monohydrate, Sodium":ti,ab,kw OR "Monosodium Urate Monohydrate":ti,ab,kw OR "Monohydrate, Monosodium Urate":ti,ab,kw OR "Urate Monohydrate, Monosodium":ti,ab,kw OR "Sodium Acid Urate Monohydrate":ti,ab,kw OR "Sodium Urate":ti,ab,kw OR "Urate, Sodium":ti,ab,kw OR "Monosodium Urate":ti,ab,kw OR "Urate, Monosodium":ti,ab,kw OR "Sodium Acid Urate":ti,ab,kw OR "Acid Urate, Sodium":ti,ab,kw OR "Urate, Sodium Acid":ti,ab,kw OR "Uric Acid Lowering Agents":ti,ab,kw OR "Urate lowering therapy":ti,ab,kw OR "ULT":ti,ab,kw 4257
10. [mh "Uricosuric Agents"] 70
11. "Uricosuric Agents":ti,ab,kw OR "Agents, Uricosuric":ti,ab,kw 75
12. [mh Allopurinol] OR [mh "Xanthine Oxidase"] OR [mh Febuxostat] OR [mh Benzbromarone] 669

13. [mh Probenecid] OR [mh Apazone] OR [mh Benzbromarone] OR "benziodarone":ti,ab,kw OR [mh Halofenate] OR "indacrinone":ti,ab,kw OR "lesinurad":ti,ab,kw OR [mh Probenecid] OR [mh "Sulfinpyrazone"] OR [mh Ticrynafen] OR "traxanox":ti,ab,kw OR [mh Zoxazolamine] 505

14. "allopurinol":ti,ab,kw OR "Xanthine Oxidase":ti,ab,kw OR "Uribenz":ti,ab,kw OR "Allopurin":ti,ab,kw OR "Allorin":ti,ab,kw OR "Allpargin":ti,ab,kw OR "Allural":ti,ab,kw OR "Pan Quimica":ti,ab,kw OR "Apulonga":ti,ab,kw OR "Apurin":ti,ab,kw OR "Atisuril":ti,ab,kw OR "Bleminol":ti,ab,kw OR "Caplenal":ti,ab,kw OR "Capurate":ti,ab,kw OR "Cellidrin":ti,ab,kw OR "Embarin":ti,ab,kw OR "Suspendol":ti,ab,kw OR "Foligan":ti,ab,kw OR "Hamarin":ti,ab,kw OR "Lopurin":ti,ab,kw OR "Lysuron":ti,ab,kw OR "Jenapurinol":ti,ab,kw OR "Milurit":ti,ab,kw OR "Milurite":ti,ab,kw OR "Novopurol":ti,ab,kw OR "Uripurinol":ti,ab,kw OR "Urosin":ti,ab,kw OR "Urtias":ti,ab,kw OR "Xanthomax":ti,ab,kw OR "Uridocid":ti,ab,kw OR "Xanturic":ti,ab,kw OR "Zygout":ti,ab,kw OR "Zyloprim":ti,ab,kw OR "Zyloric":ti,ab,kw OR "Pureduct":ti,ab,kw OR "Purinol":ti,ab,kw OR "Progout":ti,ab,kw OR "Remid":ti,ab,kw OR "Rimapurinol":ti,ab,kw OR "Antigout":ti,ab,kw OR "Antihyperuricemics":ti,ab,kw OR "Roucol":ti,ab,kw OR "Tipuric":ti,ab,kw OR "Allohexal":ti,ab,kw OR "Allohexan":ti,ab,kw OR "Alloprin":ti,ab,kw OR "Uloric":ti,ab,kw OR "febuxostat":ti,ab,kw OR "benzbromarone":ti,ab,kw 1603

15. {OR #8-#14} 5376

16. #7 AND #15 103

#### **4) KOREAMED**

KoreaMed

(MeSH\_Terms:"Gout" OR MeSH\_Terms:"Hyperuricemia" OR MeSH\_Terms:"Uric Acid" OR All\_Fields:"Gout" OR All\_Fields:"Gouts" OR All\_Fields:"Gouty" OR All\_Fields:"Hyperuricemia" OR All\_Fields:"Urate" OR All\_Fields:"Uric Acid'" OR All\_Fields:"hyperuricacidaemia" OR All\_Fields:"hyperuricacidemia" OR All\_Fields:"hyperuricaemia") 737
